# Supplementary material for: Identification of Rice Large Grain Gene GW2 by Whole-Genome Sequencing of a Large Grain-Isogenic Line Integrated with Japonica Native Gene and Its Linkage Relationship with the Co-integrated Semidwarf Gene d60 on Chromosome 2
Source: MDPI journal article supplement (doi:10.3390/ijms20215442), 2019-10-31
Supplement: s1 [file s1]

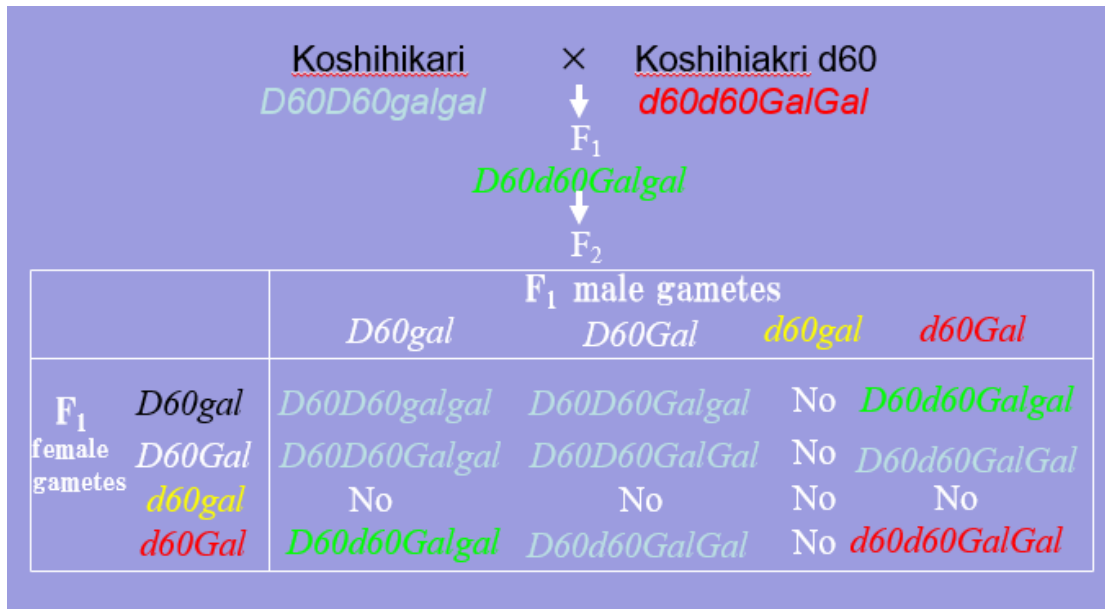

**Figure S1.** Complementary gamete lethal between semidwarfing gene *d60* and gamete lethal gene *gal*.
